# Supplementary material for: Bio-molecule functionalized rapid one-pot green synthesis of silver nanoparticles and their efficacy toward the multidrug resistant (MDR) gut bacteria of silkworms (Bombyx mori)
Source: PubMed Central journal article supplement — RSC Adv. 2020 Jun 15;10(38):22742–57. doi: 10.1039/d0ra03451g (PMC9054587; doi:10.1039/d0ra03451g), 2020-06-15
Supplement: RA-010-D0RA03451G-s001.pdf [file RA-010-D0RA03451G-s001.pdf]

**Electronic supplementary information (ESI)**

**Bio-molecule functionalized rapid one-pot green synthesis of silver nanoparticles and their efficacy on the multidrug resistant (MDR) gut bacteria of silkworms (*Bombyx mori*)**

Sudip Some<sup>1,ϕ</sup>, Biraj Sarkar<sup>2,ϕ</sup>, Kinkar Biswas<sup>3</sup>, Tushar K. Jana<sup>4</sup>, Debjoy Bhattacharjya<sup>5</sup>, Paulami Dam<sup>1</sup>, Rittick Mondal<sup>1</sup>, Anoop Kumar<sup>6</sup>, Apurba K. Deb<sup>7</sup>, Abdul Sadat<sup>8</sup>, Soumen Saha<sup>5</sup>, Ahmet Kati<sup>9</sup>, Ismail Ocsoy<sup>10</sup>, Octavio L. Franco<sup>11</sup>, Amitava Mandal<sup>12,\*</sup>, Sukhendu Mandal<sup>2,\*</sup>, Amit K. Mandal<sup>1,13,\*</sup>, İktbal A. İnce<sup>14</sup>

**Table S1:** Summarized elemental distribution of bio-molecule functionalized AgNPs

| Element | Peak | Area  | k      | Abs    | Weight% | Weight% | Atomic% |
|---------|------|-------|--------|--------|---------|---------|---------|
|         | Area | Sigma | factor | Corrn. |         | Sigma   |         |
| C K     | 1356 | 76    | 1.706  | 1.000  | 5.63    | 0.31    | 27.62   |
| O K     | 332  | 43    | 1.353  | 1.000  | 1.09    | 0.14    | 4.03    |
| Cu K    | 5463 | 119   | 3.427  | 1.000  | 45.52   | 0.77    | 42.25   |
| Ag L    | 9476 | 228   | 2.072  | 1.000  | 47.76   | 0.78    | 26.11   |
| Totals  |      |       |        |        | 100.00  |         |         |

**Table S2:** DLS and the  $\xi$ -potential of bio-molecule functionalized AgNPs

N.B: Data are expressed as mean  $\pm$  SD (n = 3).

| <b>Medium</b>         | <b>Hydrodynamic size (<math>d_h</math>) (nm)</b> |                | <b>PDI</b>       |                  | <b><math>\xi</math>-potential (mV)</b> |                 |
|-----------------------|--------------------------------------------------|----------------|------------------|------------------|----------------------------------------|-----------------|
|                       | 0 min                                            | 30 min         | 0 min            | 30 min           | 0 min                                  | 30 min          |
| <b>MH broth</b>       | 25.3 $\pm$ 1.2                                   | 25.4 $\pm$ 1.6 | 0.22 $\pm$ 0.006 | 0.23 $\pm$ 0.004 | -17.3 $\pm$ 1.5                        | -16.8 $\pm$ 2.5 |
| <b>DMEM/<br/>F-12</b> | 50.5 $\pm$ 2.5                                   | 53.7 $\pm$ 3.1 | 0.32 $\pm$ 0.008 | 0.34 $\pm$ 0.002 | -25.6 $\pm$ 2.2                        | -24.2 $\pm$ 2.6 |

**Table S3:** Spectrometric data of compounds found in aqueous leaf extract of *M. alba* L. S-1635.

| Sr. No. | (m/z)<br>Calculated | (m/z) Found | Molecular<br>Formula                           | 2D-Structure                                                                          | Name of the Compounds | References |
|---------|---------------------|-------------|------------------------------------------------|---------------------------------------------------------------------------------------|-----------------------|------------|
| 1       | 170.0215            | 170.8545    | C <sub>7</sub> H <sub>6</sub> O <sub>5</sub>   | 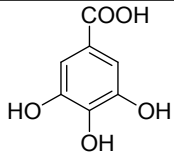   | Gallic acid           | 64         |
| 2       | 392.1988            | 392.1861    | C <sub>25</sub> H <sub>28</sub> O <sub>4</sub> |   | Kazinol B             | 65         |
| 3       | 370.1416            | 370.1861    | C <sub>21</sub> H <sub>22</sub> O <sub>6</sub> |  | Sophoraisoflavanone A | 65         |

|   |          |          |                      |                                                                                     |                     |    |
|---|----------|----------|----------------------|-------------------------------------------------------------------------------------|---------------------|----|
| 4 | 418.1416 | 418.1799 | $C_{25}H_{22}O_6$    | 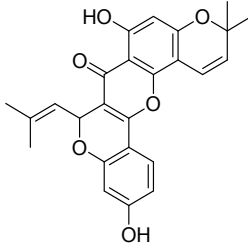 | Cyclomorusin        | 65 |
| 5 | 422.0849 | 422.2616 | $C_{19}H_{18}O_{11}$ |  | Mangiferin xanthone | 66 |
| 6 | 412.3705 | 412.1572 | $C_{29}H_{48}O$      |  | Stigmasterol        | 67 |

**Table S4:** Zone of inhibition (cm) produced by the *Enterobacter hormaechei* subsp. *hormaechei* strain ASE against standard antibiotic discs.

| Sr. No                              | Antibiotics(Himedia)        | Symbol | Concentration/Dose  | Inhibition Zone         | Antibiotic susceptibility |
|-------------------------------------|-----------------------------|--------|---------------------|-------------------------|---------------------------|
| <b>Cell wall inhibitors</b>         |                             |        |                     |                         |                           |
| 1                                   | Carbenicillin               | CB     | 100 mcg/disc        | no zone observed        | Resistant                 |
| 2                                   | Penicillin G                | P      | 10 units/disc       | no zone observed        | Resistant                 |
| 3                                   | Bacitracin                  | B      | 10 units/disc       | no zone observed        | Resistant                 |
| 4                                   | Cefuroxime                  | CXM    | 30 mcg/disc         | 1.4 cm                  | Sensitive                 |
| 5                                   | Aztreonam                   | AT     | 30 mcg/disc         | 1.5 cm                  | Sensitive                 |
| 6                                   | Amoxicillin+Clavulonic acid | AMC    | 30 mcg (20/10)/disc | #                       | #                         |
| 7                                   | Cefoperazone                | CPZ    | 75 mcg/disc         | 1.4 cm                  | Sensitive                 |
| 8                                   | Vancomycin                  | VA     | 30 mcg/disc         | 0.8 cm                  | Sensitive                 |
| 9                                   | Mezlocillin                 | MZ     | 75 mcg/disc         | 0.1 cm                  | negligible sensitivity    |
| 10                                  | Cefpodoxime                 | CPD    | 10 mcg/disc         | no proper zone observed | Resistant                 |
| 11                                  | Ceftriaxone                 | CTR    | 30 mcg/disc         | 3.4 cm                  | Sensitive                 |
| 12                                  | Cefixime                    | CFM    | 5 mcg/disc          | 1.9 cm                  | Sensitive                 |
| <b>Outer membrane inhibitors</b>    |                             |        |                     |                         |                           |
| 13                                  | Colistin                    | CL     | 10 mcg/disc         | 1.1 cm                  | Sensitive                 |
| 14                                  | Polymyxin B                 | PB     | 300 units/disc      | 1.2 cm                  | Sensitive                 |
| <b>Nucleic acid inhibitors</b>      |                             |        |                     |                         |                           |
| 15                                  | Norfloxacin                 | NX     | 10 mcg/disc         | 1.0 cm                  | Sensitive                 |
| 16                                  | Co-trimoxazole              | CoT    | 25 mcg/disc         | 3.2 cm                  | Sensitive                 |
| 17                                  | Levofloxacin                | LE     | 5 mcg/disc          | 3.6 cm                  | Sensitive                 |
| 18                                  | Novobiocine                 | NV     | 30 mcg/disc         | no zone observed        | Resistant                 |
| 19                                  | Rifampicin                  | RIF    | 5 mcg/disc          | 0.7 cm                  | Sensitive                 |
| 20                                  | Ofloxacin                   | OF     | 5 mcg/disc          | 1.5 cm                  | Sensitive                 |
| 21                                  | Nitrofurantoin              | NIT    | 300 mcg/disc        | no proper zone observed | Resistant                 |
| <b>Protein synthesis inhibitors</b> |                             |        |                     |                         |                           |
| 22                                  | Oleandomycin                | OL     | 15 mcg/disc         | no zone observed        | Resistant                 |

|    |                 |     |             |                  |           |
|----|-----------------|-----|-------------|------------------|-----------|
| 23 | Clindamycin     | CD  | 2 mcg/disc  | 1.5 cm           | Sensitive |
| 24 | Lincomycin      | L   | 15 mcg/disc | no zone observed | Resistant |
| 25 | Tobramycin      | TOB | 10 mcg/disc | 0.6 cm           | Sensitive |
| 26 | Tetracyclin     | TE  | 30 mcg/disc | 2.8 cm - 3.0 cm  | Sensitive |
| 27 | Chloramphenicol | C   | 30 mcg/disc | 2.4 cm           | Sensitive |
| 28 | Gentamicin      | GEN | 10 mcg/disc | 2.5 cm           | Sensitive |
| 29 | Streptomycin    | S   | 10 mcg/disc | 2.3 cm           | Sensitive |
| 30 | Amikacin        | AK  | 30 mcg/disc | 2.5 cm           | Sensitive |
| 31 | Neomycin        | N   | 30 mcg/disc | 2.2 cm           | Sensitive |

---

Note: #; Overnight growth showed tertiary growth, faint inhibition zone of 1.6 cm was observed
